# Supplementary material for: Local adaptation to continuous mowing makes the noxious weed Solanum elaeagnifolium a superweed candidate by improving fitness and defense traits
Source: PubMed Central journal article supplement (PMC7988165; doi:10.1038/s41598-021-85789-z), 2021-03-23
Supplement: 41598_2021_85789_MOESM1_ESM.pdf [file 41598_2021_85789_MOESM1_ESM.pdf]

**Local adaptation to continuous mowing makes the noxious weed *Solanum elaeagnifolium* a superweed candidate by improving fitness and defense traits.**

Jesus Chavana<sup>1</sup>, Sukhman Singh<sup>1</sup> Alejandro Vazquez <sup>1</sup>, Bradley Christoffersen<sup>1</sup>, Alexis Racelis<sup>1, 2</sup>, and Rupesh R. Kariyat<sup>1, 2</sup>

<sup>1</sup> Department of Biology, The University of Texas Rio Grande Valley, Edinburg, Texas 78539.

<sup>2</sup> School of Earth, Environmental and Marine Sciences, Edinburg, Texas 78539

Author for correspondence: Rupesh.kariyat@utrgv.edu

## Supplementary Figures and Tables

Table 1. Location coordinates of mowed and unmowed sub-populations of SLN used for this study

| <i>Location</i> | <i>Latitude</i> | <i>Longitude</i> | <i>Treatment</i> |
|-----------------|-----------------|------------------|------------------|
| Edinburg        | 26.313476       | -98.145862       | Mowed            |
| Edinburg        | 26.306722       | -98.145631       | Mowed            |
| McAllen         | 26.27475        | -98.223654       | Unmowed          |
| McAllen         | 26.168613       | -98.313712       | Unmowed          |

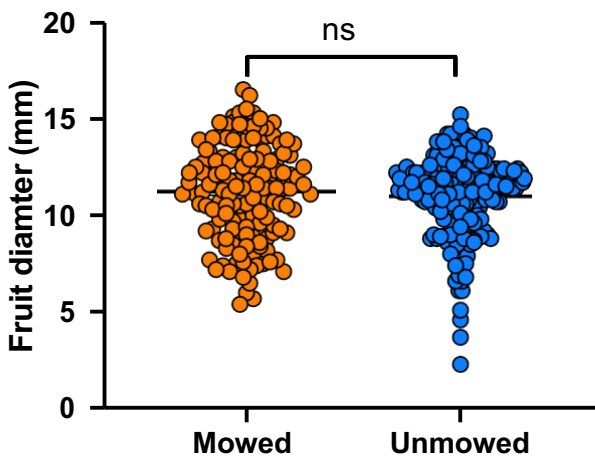

Supplementary figure 1: Results of fruit diameter from plants collected from 4 mowed and unmowed sub-populations( $P=0.269$ ).
